# Supplementary material
Source: MDPI journal article supplement (https://www.mdpi.com/2073-8994/13/10/1832)
Supplement: s1 [file s1]

# Supplementary Data

## Polar Alkoxy Group and Pyridyl Effects on the Mesomorphic Behavior of New Non-symmetrical Schiff Base Liquid Crystals

Sayed Z. Mohammady,<sup>1,2,\*</sup> Daifallah M. Aldhayan,<sup>1</sup> Mohammed A. Alshammri,<sup>1</sup> Ayoub K. Alshammari,<sup>1</sup> Mohammed Alazmi,<sup>3</sup> Kanubhai D. Katariya,<sup>4</sup> Mariusz Jaremko,<sup>5</sup> and Mohamed Hagar<sup>3\*</sup>

1. Department of Chemistry, College of Science, King Saud University, Riyadh 11451, Saudi Arabia
2. Department of Chemistry, Faculty of Science, Cairo University, P.O. 12613, Giza, Egypt
3. Chemistry Department, Faculty of Science, Alexandria University, Alexandria 21321, Egypt
4. Department of Chemistry, Faculty of Science, the Maharaja Sayajirao University of Baroda, Vadodara-390002, Gujarat, India.
5. King Abdullah University of Science and Technology (KAUST), Biological and Environmental Sciences & Engineering Division (BESE), Thuwal, 23955-6900, Saudi Arabia.

\*Correspondence: Mohamed Hagar (Mohamed.hagar@alexu.edu.eg); Sayed Z. Mohammady (sahmed2.c@ksu.edu.sa)

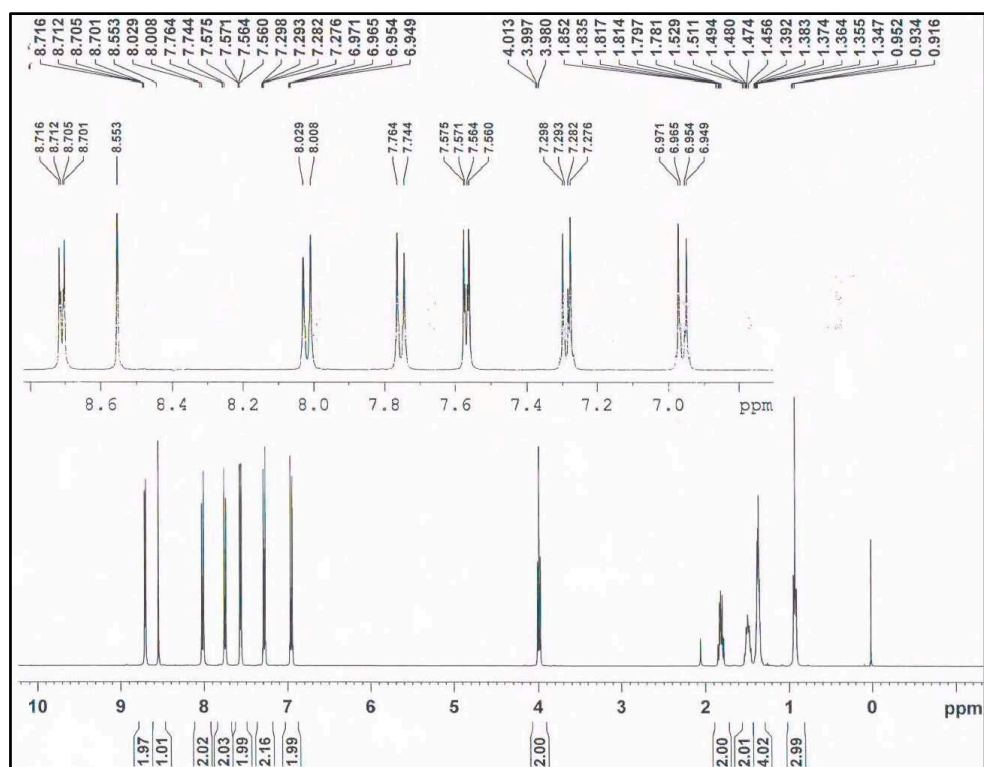

Figure S1: <sup>1</sup>H NMR of compound (OC6) 3.d

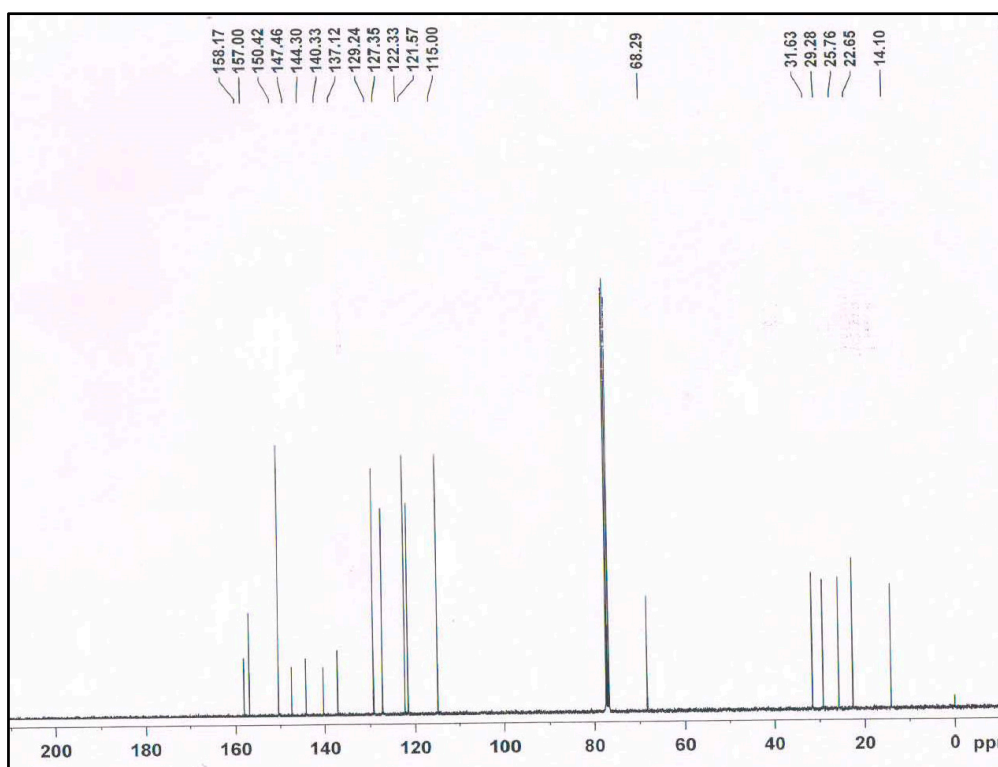

Figure S2: <sup>13</sup>C NMR of compound (OC6) 3.d

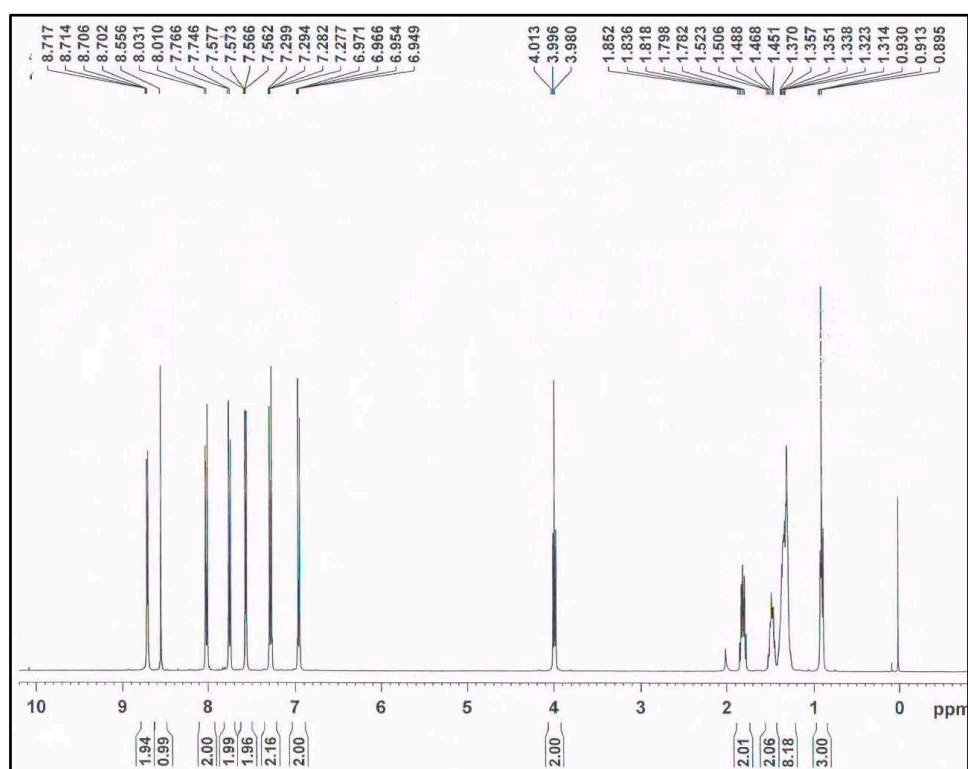

Figure S3: <sup>1</sup>H NMR of compound (OC8) 3.e

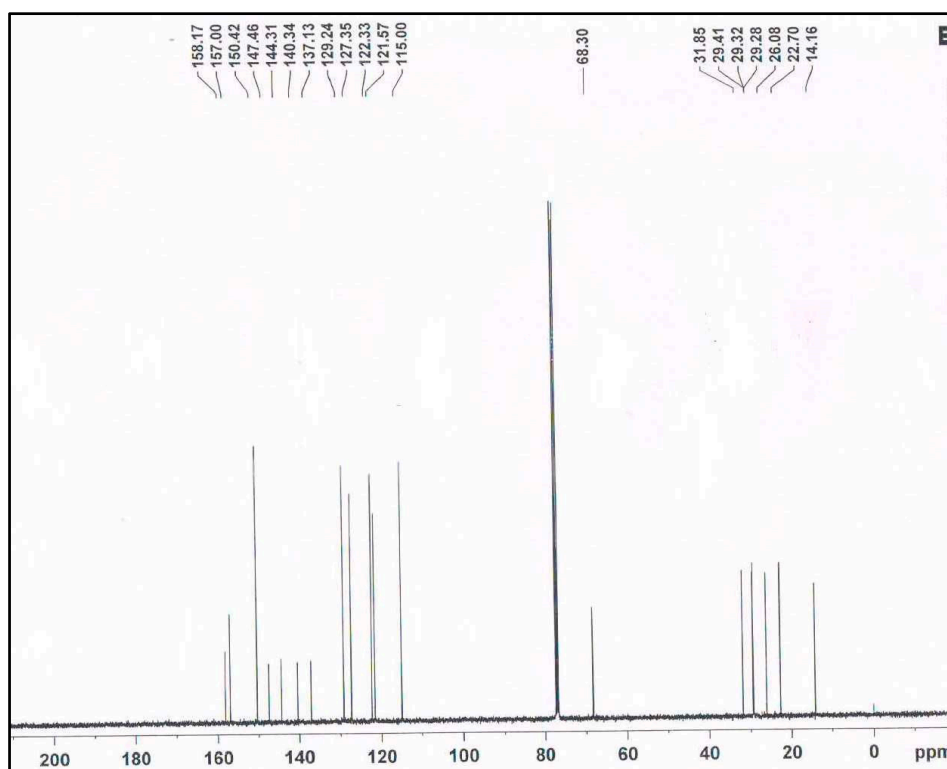

Figure S4: <sup>13</sup>C NMR of compound (OC8) 3.e

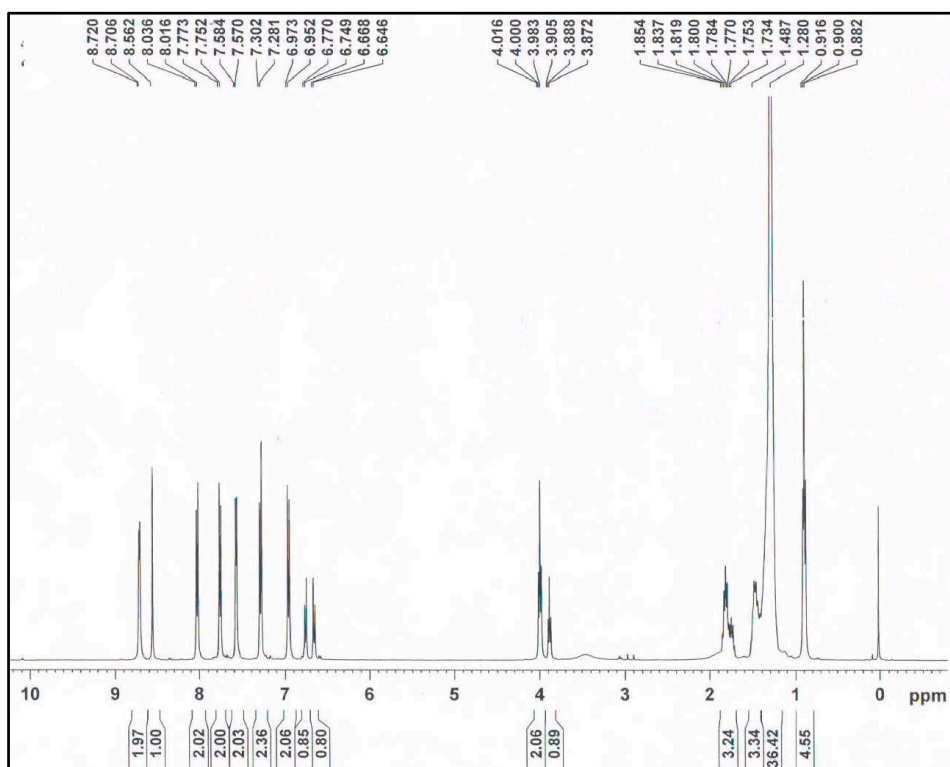

Figure S5: <sup>1</sup>H NMR of compound 3a (OC16) 3.f
